# Supplementary material for: Hydrostatic Filtration Enables Large-Scale Production of Outer Membrane Vesicles That Effectively Protect Chickens against Gallibacterium anatis
Source: PubMed Central journal article supplement (PMC7158690; doi:10.3390/vaccines8010040), 2020-01-23
Supplement: vaccines-08-00040-s001.pdf [file vaccines-08-00040-s001.pdf]

| <b>Group:</b><br><b>Trial:</b> |                                                   | <b>Animal nr:</b><br><b>Date:</b> |  | <b>Score</b> |   |   |   |   |
|--------------------------------|---------------------------------------------------|-----------------------------------|--|--------------|---|---|---|---|
|                                |                                                   |                                   |  | 0            | 1 | 2 | 3 | 4 |
| <b>Laying</b>                  |                                                   |                                   |  |              |   |   |   |   |
| <b>Peritoneum</b>              | Inflammatory reaction                             |                                   |  |              |   |   |   |   |
|                                | Amount of exudate                                 |                                   |  |              |   |   |   |   |
|                                | Type of exudate                                   |                                   |  |              |   |   |   |   |
|                                | Transparency of peritoneum                        |                                   |  |              |   |   |   |   |
| <b>Ovary</b>                   | Vascularisation                                   |                                   |  |              |   |   |   |   |
|                                | Pus                                               |                                   |  |              |   |   |   |   |
|                                | Degenerative/Regressive                           |                                   |  |              |   |   |   |   |
| <b>Salpinx</b>                 | Circulation                                       |                                   |  |              |   |   |   |   |
|                                | Regression                                        |                                   |  |              |   |   |   |   |
|                                | Pus                                               |                                   |  |              |   |   |   |   |
| <b>Spleen</b>                  | Proliferation                                     |                                   |  |              |   |   |   |   |
|                                | Enlarged<br>Size in cm: lenght: _____ width _____ |                                   |  |              |   |   |   |   |
| <b>Other</b>                   | Liver                                             |                                   |  |              |   |   |   |   |
|                                | Lungs                                             |                                   |  |              |   |   |   |   |
|                                |                                                   |                                   |  |              |   |   |   |   |

|           |                              |                                                                                                      |
|-----------|------------------------------|------------------------------------------------------------------------------------------------------|
| <b>P1</b> | Inflammatory reaction        | 0: None<br>1: Local at the entrance<br>2: Around the ovary<br>3: In the omentum<br>4: All peritoneum |
| <b>P2</b> | Amount of exudate            | 0: None<br>1: Sparse<br>2: Some<br>3: Abundant                                                       |
| <b>P3</b> | Transparency of peritoneum   | 0: Clear<br>1: Unclear<br>2: Cloudy<br>3: Milky<br>4: Opaque                                         |
| <b>P4</b> | Type of exudate              | 0: None<br>1: Aqueous<br>2: Lump of pus<br>3: Flakes<br>4: Confluent                                 |
| <b>O1</b> | Vascularisation              | 0: None<br>1: Little<br>2: Moderate<br>3: Abundant                                                   |
| <b>O2</b> | Pus                          | 0: None<br>1: Local<br>2: Multifocal<br>3: Diffused                                                  |
| <b>O3</b> | Deformed/regressive follicle | 0: None<br>1: Few (1-2)<br>2: Less than half (3-4)<br>3: Over 4                                      |
| <b>S1</b> | Vascularisation              | 0: None<br>1: Little<br>2: Moderate<br>3: Abundant                                                   |
| <b>S2</b> | Pus                          | 0: None<br>1: Local<br>2: Multifocal<br>3: Diffused                                                  |
| <b>S3</b> | Regression                   | 0: None/normal<br>1: Below average<br>2: More than average<br>3: Non-functional                      |
| <b>M1</b> | Lymphoid reaction            | 0: None<br>1: Little proliferation<br>2: Distinct proliferation                                      |
| <b>M2</b> | Enlargement                  | 0: None<br>1: Less than double size<br>2: More than double size<br>3: Atrophic/depleted              |
